# Supplementary material for: Superwetting charged copper foams with long permeation channels for ultrafast emulsion separation and surfactant removal
Source: Royal Society of Chemistry journal article supplement (doi:10.1039/d1ta02143e), 2021-01-01
Supplement: d1ta02143e5.pdf [file d1ta02143e5.pdf]

## *Electronic Supplementary Information*

### **Superwetting charged copper foams with long permeation channels for ultrafast emulsion separation and surfactant removal†**

Jihao Zuo,<sup>a</sup> Zehao Chen,<sup>a</sup> Yi Zhou,<sup>a</sup> Zihan Liu,<sup>a</sup> Cailong Zhou,<sup>b</sup> Shouping Xu,<sup>a</sup> Jiang Cheng,<sup>a</sup>  
Xiufang Wen\*<sup>a</sup> and Pihui Pi\*<sup>a</sup>

\* Corresponding authors

<sup>a</sup> School of Chemistry and Chemical Engineering, Guangdong Provincial Key Lab of Green Chemical Product Technology, Guangdong Engineering Technology Research Center of Advanced Insulating Coating, South China University of Technology, Guangzhou 510640, P. R. China

**E-mail:** xfwen@scut.edu.cn, pphi@scut.edu.cn

<sup>b</sup> School of Chemistry and Chemical Engineering, Chongqing University, Chongqing 400044, P. R. China

## Supplementary Figure and Movie Captions

**Fig. S1** Schematic representation for (a) preparation of CF-Cu(OH)<sub>2</sub> *via* a three-electrode anodization reaction and the corresponding electrochemical reaction equation. Schematic representation of directional electric field driven assembly method for (b) preparation of CF-Cu(OH)<sub>2</sub>@CNTs-NH<sub>2</sub> *via* the assembly of CNTs-NH<sub>2</sub> on CF-Cu(OH)<sub>2</sub> and (c) preparation of CF-Cu(OH)<sub>2</sub>@CNTs-COOH *via* the assembly of CNTs-COOH on CF-Cu(OH)<sub>2</sub>.

**Fig. S2** Digital pictures of the pristine copper foam, CF-Cu(OH)<sub>2</sub>, CF-Cu(OH)<sub>2</sub>@CNTs-NH<sub>2</sub> and CF-Cu(OH)<sub>2</sub>@CNTs-COOH.

**Fig. S3** XRD pattern of the CF-Cu(OH)<sub>2</sub>.

**Fig. S4** (a) The SEM image of multilevel cage-like architecture for the copper foam. (b) Schematic illustration of the assembly of CNTs-NH<sub>2</sub> on the CF-Cu(OH)<sub>2</sub> *via* directional electric field driven assembly method. (c) The diagram of exterior area and interior area of the CF-Cu(OH)<sub>2</sub>@CNTs-NH<sub>2</sub>.

**Fig. S5** The effect of concentration of CNTs solution on loading amount of CNTs of the (a) CF-Cu(OH)<sub>2</sub>@CNTs-NH<sub>2</sub> and (b) CF-Cu(OH)<sub>2</sub>@CNTs-COOH (The electric field assembly time of CF-Cu(OH)<sub>2</sub>@CNTs-NH<sub>2</sub> and CF-Cu(OH)<sub>2</sub>@CNTs-COOH were fixed at 15 min and 5 min, respectively).

**Fig. S6** The effect of electric field assembly time on loading amount of CNTs of the (a) CF-Cu(OH)<sub>2</sub>@CNTs-NH<sub>2</sub> and (b) CF-Cu(OH)<sub>2</sub>@CNTs-COOH (The concentrations of CNTs-NH<sub>2</sub>/CNTs-COOH solution in the assembly process for CF-Cu(OH)<sub>2</sub>@CNTs-NH<sub>2</sub> and CF-Cu(OH)<sub>2</sub>@CNTs-COOH were all fixed at 1 g·L<sup>-1</sup>).

**Fig. S7** SEM images of (a) CF-Cu(OH)<sub>2</sub>@CNTs-NH<sub>2</sub> assembled with 0.1 g·L<sup>-1</sup> CNTs-NH<sub>2</sub> solution for 15 min, (b) CF-Cu(OH)<sub>2</sub>@CNTs-COOH assembled with 0.1 g·L<sup>-1</sup> CNTs-COOH solution for 5 min.

**Fig. S8** SEM images of (a) CF-Cu(OH)<sub>2</sub>@CNTs-NH<sub>2</sub> assembled with 5 g·L<sup>-1</sup> CNTs-NH<sub>2</sub> solution for 15 min, (b) CF-Cu(OH)<sub>2</sub>@CNTs-COOH assembled with 5 g·L<sup>-1</sup> CNTs-COOH solution for 5 min.

**Fig. S9** The EDS mapping for (a) CF-Cu(OH)<sub>2</sub>@CNTs-NH<sub>2</sub> and (b) CF-Cu(OH)<sub>2</sub>@CNTs-COOH.

**Fig. S10** The water contact angle (WCA), oil contact angle (OCA) and underwater oil contact angle (UWOCA) of (a) pristine copper foam and (b) CF-Cu(OH)<sub>2</sub>.

**Fig. S11** The measurement of oil intrusion pressures of 30 pieces of CF-Cu(OH)<sub>2</sub>@CNTs-NH<sub>2</sub> and 25 pieces of CF-Cu(OH)<sub>2</sub>@CNTs-COOH (Oil are toluene (red) and 1,2-dichloroethane (purple)).

**Fig. S12** (a) The appearance of the filtrates for SDS-T/W emulsion separated by CF-Cu(OH)<sub>2</sub>@CNTs-NH<sub>2</sub> with different numbers (1, 5, 10, 15, 20, 25 and 30). (b) The appearance of the filtrates for DTAC-T/W emulsion separated by CF-Cu(OH)<sub>2</sub>@CNTs-COOH with different numbers (1, 5, 10, 15, 20, 25 and 30).

**Table S1** The atomic fractions of C, N, O and Si elemental for CF-Cu(OH)<sub>2</sub>, CF-Cu(OH)<sub>2</sub>@CNTs-NH<sub>2</sub> and CF-Cu(OH)<sub>2</sub>@CNTs-COOH.

**Table S2** The intrusion pressures and the oil column heights of 30 pieces of CF-Cu(OH)<sub>2</sub>@CNTs-NH<sub>2</sub> and 25 pieces of CF-Cu(OH)<sub>2</sub>@CNTs-COOH contacting toluene and 1,2-dichloroethane.

**Movie S1** The SDS-T/W emulsion is separated by 30 pieces of CF-Cu(OH)<sub>2</sub>@CNTs-NH<sub>2</sub>.

**Movie S2** The DTAC-T/W emulsion is separated by 25 pieces of CF-Cu(OH)<sub>2</sub>@CNTs-COOH.

**Movie S3** The SDS aqueous solution is filtered by 30 pieces of CF-Cu(OH)<sub>2</sub>@CNTs-NH<sub>2</sub>.

**Movie S4** The DTAC aqueous solution is filtered by 25 pieces of CF-Cu(OH)<sub>2</sub>@CNTs-COOH.

(a) In-situ growth of  $\text{Cu}(\text{OH})_2$  nanoneedles

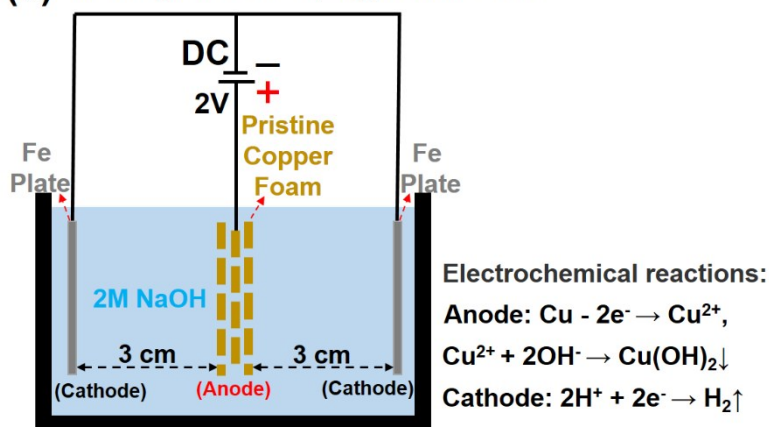

(b) Assembly of  $\text{CNTs-NH}_2$

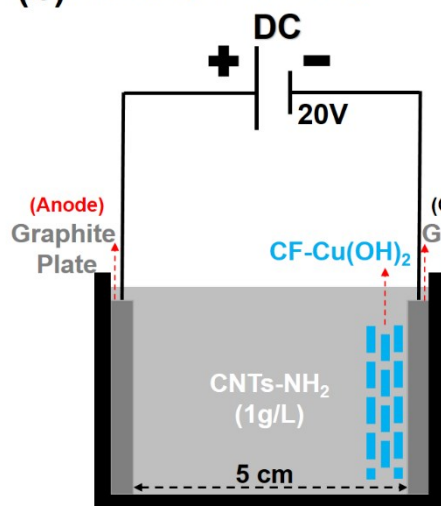

(c) Assembly of  $\text{CNTs-COOH}$

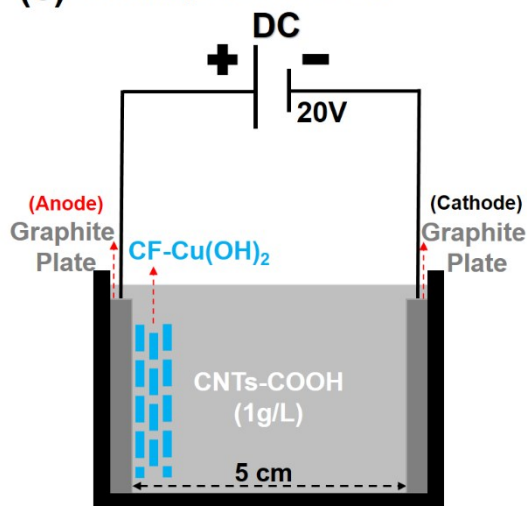

**Fig. S1** Schematic representation for (a) preparation of  $\text{CF-Cu}(\text{OH})_2$  via a three-electrode anodization reaction and the corresponding electrochemical reaction equation. Schematic representation of directional electric field driven assembly method for (b) preparation of  $\text{CF-Cu}(\text{OH})_2 @ \text{CNTs-NH}_2$  via the assembly of  $\text{CNTs-NH}_2$  on  $\text{CF-Cu}(\text{OH})_2$  and (c) preparation of  $\text{CF-Cu}(\text{OH})_2 @ \text{CNTs-COOH}$  via the assembly of  $\text{CNTs-COOH}$  on  $\text{CF-Cu}(\text{OH})_2$ .

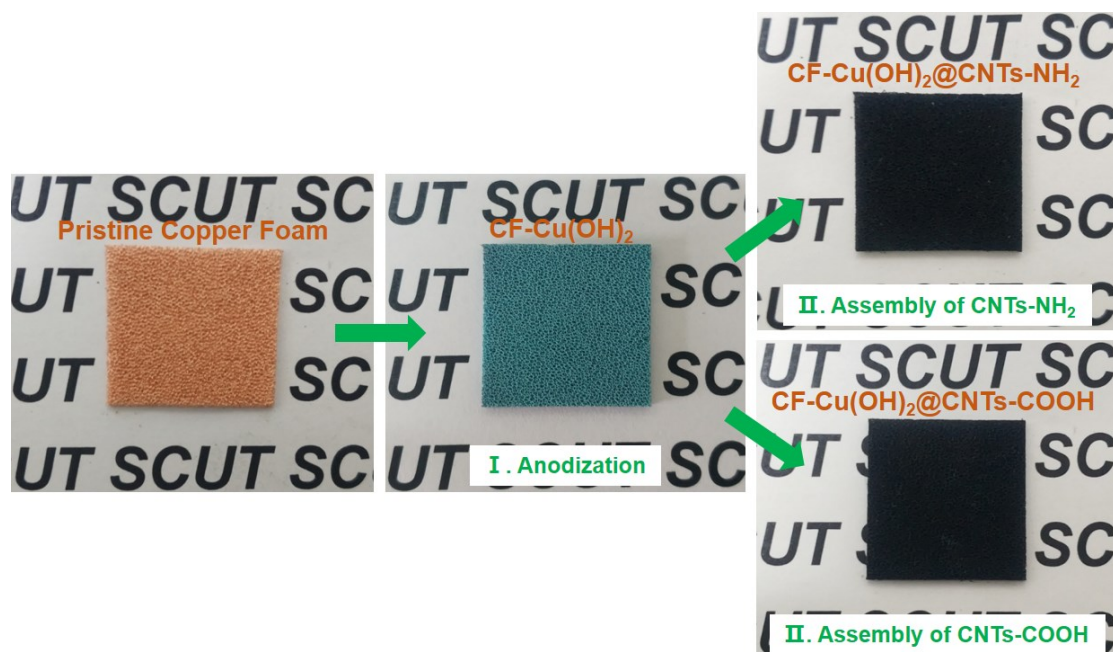

**Fig. S2** Digital pictures of the pristine copper foam, CF-Cu(OH)<sub>2</sub>, CF-Cu(OH)<sub>2</sub>@CNTs-NH<sub>2</sub> and CF-Cu(OH)<sub>2</sub>@CNTs-COOH.

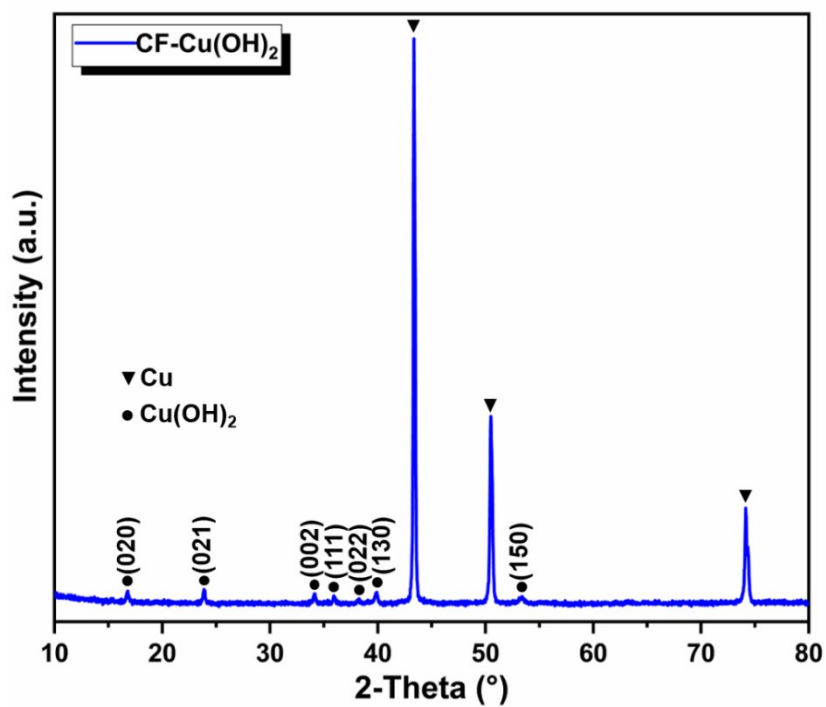

**Fig. S3** XRD pattern of the CF-Cu(OH)<sub>2</sub>.

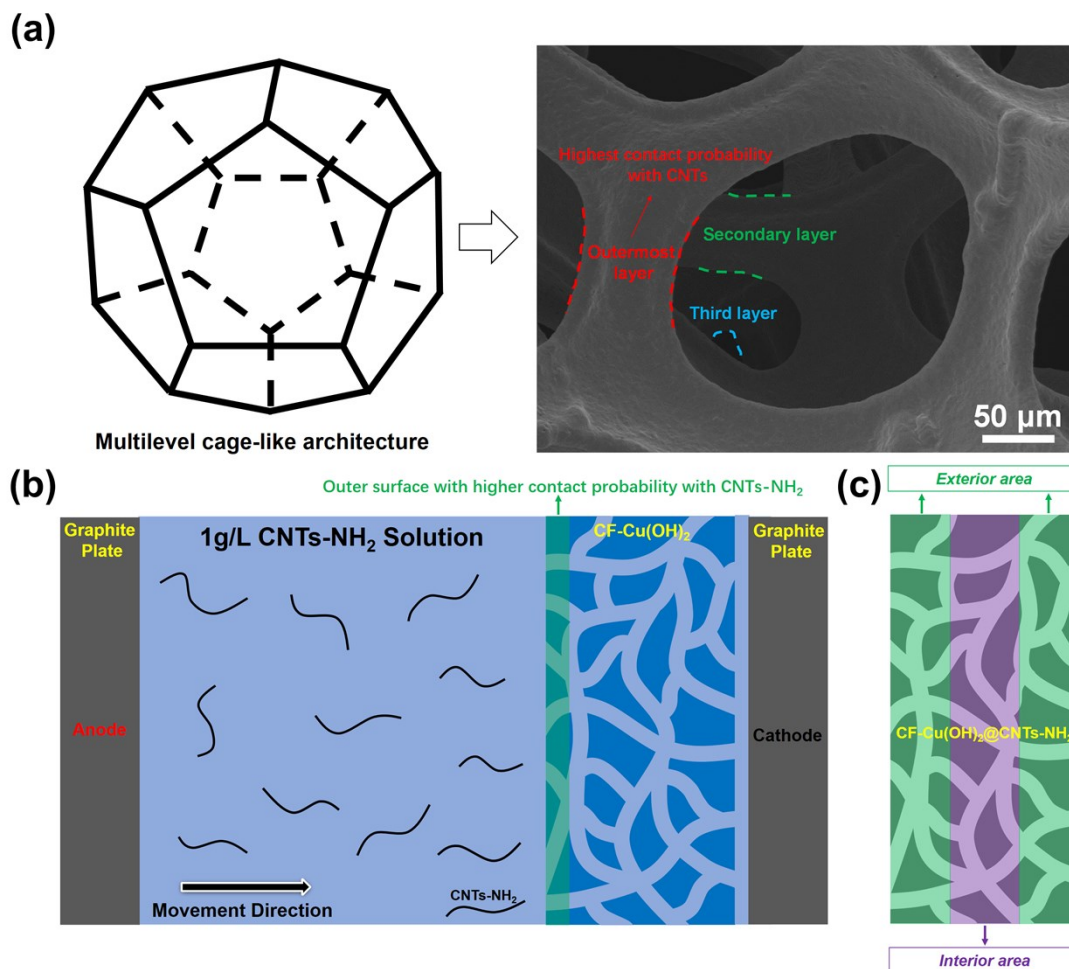

**Fig. S4** (a) The SEM image of multilevel cage-like architecture for the copper foam. (b) Schematic illustration of the assembly of CNTs-NH<sub>2</sub> on the CF-Cu(OH)<sub>2</sub> via directional electric field driven assembly method. (c) The diagram of exterior area and interior area of the CF-Cu(OH)<sub>2</sub>@CNTs-NH<sub>2</sub>.

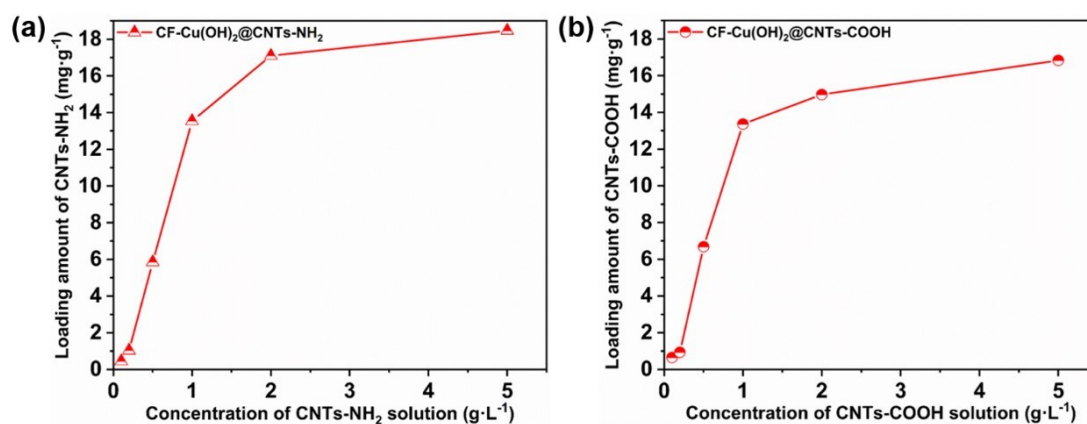

**Fig. S5** The effect of concentration of CNTs solution on loading amount of CNTs of the (a) CF-Cu(OH)<sub>2</sub>@CNTs-NH<sub>2</sub> and (b) CF-Cu(OH)<sub>2</sub>@CNTs-COOH (The electric field assembly

time of CF-Cu(OH)<sub>2</sub>@CNTs-NH<sub>2</sub> and CF-Cu(OH)<sub>2</sub>@CNTs-COOH were fixed at 15 min and 5 min, respectively).

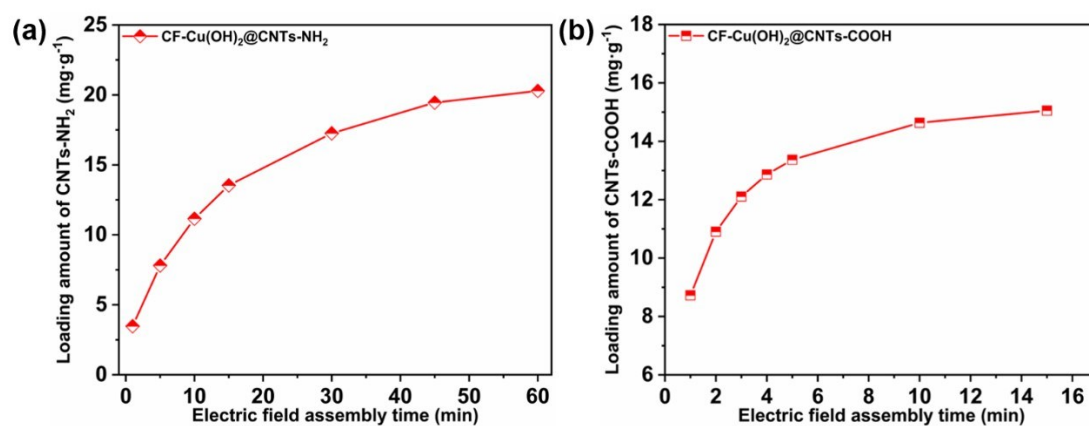

**Fig. S6** The effect of electric field assembly time on loading amount of CNTs of the (a) CF-Cu(OH)<sub>2</sub>@CNTs-NH<sub>2</sub> and (b) CF-Cu(OH)<sub>2</sub>@CNTs-COOH (The concentrations of CNTs-NH<sub>2</sub>/CNTs-COOH solution in the assembly process for CF-Cu(OH)<sub>2</sub>@CNTs-NH<sub>2</sub> and CF-Cu(OH)<sub>2</sub>@CNTs-COOH were all fixed at 1 g·L<sup>-1</sup>).

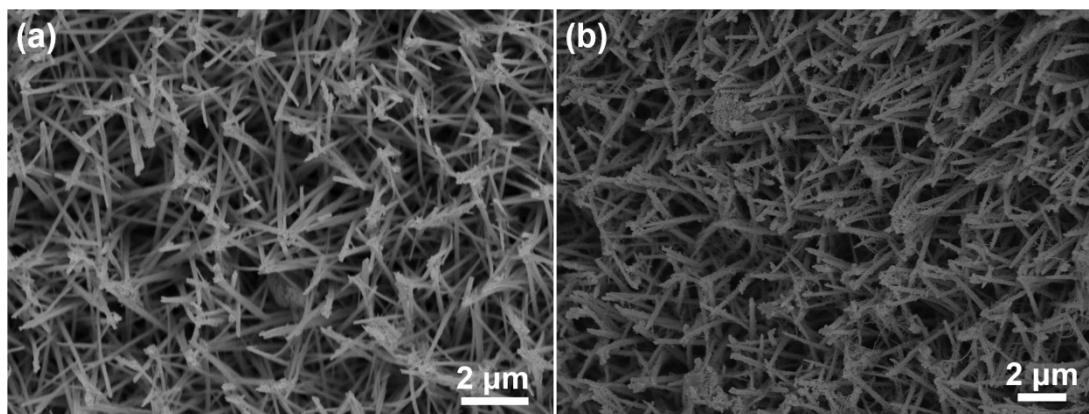

**Fig. S7** SEM images of (a) CF-Cu(OH)<sub>2</sub>@CNTs-NH<sub>2</sub> assembled with 0.1 g·L<sup>-1</sup> CNTs-NH<sub>2</sub> solution for 15 min, (b) CF-Cu(OH)<sub>2</sub>@CNTs-COOH assembled with 0.1 g·L<sup>-1</sup> CNTs-COOH solution for 5 min.

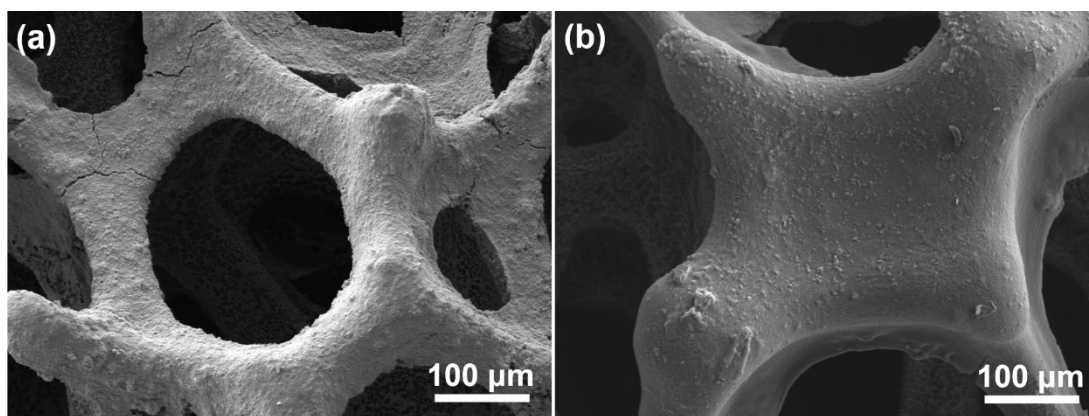

**Fig. S8** SEM images of (a) CF-Cu(OH)<sub>2</sub>@CNTs-NH<sub>2</sub> assembled with 5 g·L<sup>-1</sup> CNTs-NH<sub>2</sub> solution for 15 min, (b) CF-Cu(OH)<sub>2</sub>@CNTs-COOH assembled with 5 g·L<sup>-1</sup> CNTs-COOH solution for 5 min.

### Supplementary results and discussion

During the preparation of copper foams, the surface morphology will be affected by the concentration of CNTs solution and the electric field assembly time. If the concentration of CNTs-NH<sub>2</sub>/CNTs-COOH solution is too low or the electric field assembly time is too short, the assembly density of CNTs-NH<sub>2</sub>/CNTs-COOH on the copper foams will be very small. On the contrary, If the concentration of CNTs-NH<sub>2</sub>/CNTs-COOH solution is too high or the electric field assembly time is too long, the assembly density of CNTs-NH<sub>2</sub>/CNTs-COOH on the copper foams will be relatively dense. Too low assembly density of CNTs-NH<sub>2</sub>/CNTs-COOH will result in a small number of CNTs-NH<sub>2</sub>/CNTs-COOH on copper foam, which is very unfavorable for demulsification. Too high assembly density of CNTs-NH<sub>2</sub>/CNTs-COOH will cause an excess of CNTs-NH<sub>2</sub>/CNTs-COOH on the copper foam. The assembly density of CNTs-NH<sub>2</sub>/CNTs-COOH was calculated by the loading amount of CNTs-NH<sub>2</sub>/CNTs-COOH in this work, and the weights of copper foam before and after assembling CNTs-NH<sub>2</sub>/CNTs-COOH were weighed by ultra-micro balance (Mettler Toledo XPR10/AC, Switzerland). For CF-Cu(OH)<sub>2</sub>@CNTs-NH<sub>2</sub>, when the concentration of CNTs-NH<sub>2</sub> solution is as low as 0.1 g·L<sup>-1</sup> with the electric field assembly time fixed at 15 min, the loading amount of CNTs-NH<sub>2</sub> is only 0.453 mg·g<sup>-1</sup> (Fig. S5a), and the number of CNTs-NH<sub>2</sub> in the exterior area is very small under SEM observation (Fig. S7a). When the concentration of CNTs-NH<sub>2</sub> solution increases gradually, the loading amount of CNTs-NH<sub>2</sub> also increases, and the loading amount reaches 13.543 mg·g<sup>-1</sup> at 1 g·L<sup>-1</sup> of the CNTs-NH<sub>2</sub> concentration. After further increasing the



concentration of CNTs-NH<sub>2</sub> solution, after which the growth rate of loading amount of CNTs-NH<sub>2</sub> on copper foam gradually slows down. This is because the Cu(OH)<sub>2</sub> nanoneedles have been completely covered by a certain amount of CNTs-NH<sub>2</sub>, and excessive CNTs-NH<sub>2</sub> cannot be combined with Cu(OH)<sub>2</sub> nanoneedles through electrostatic bonding and disorderly winding fixation. As we can see from Fig. S8a, the whole pentagonal cage-like skeleton is thickly wrapped by CNTs-NH<sub>2</sub>. Unfortunately, once the CNTs-NH<sub>2</sub> layer is piled up too heavy, part of the area will be cracked due to the inability to bear the weight. The loading amount of CNTs-COOH shows the same change trend when the electric field assembly time of CF-Cu(OH)<sub>2</sub>@CNTs-COOH is fixed at 5 min (Fig. S5b and S7b). Furthermore, Fig. S6 shows the loading amount of CNTs-NH<sub>2</sub>/CNTs-COOH as a function of electric field assembly time. The loading amount of CNTs-NH<sub>2</sub>/CNTs-COOH of CF-Cu(OH)<sub>2</sub>@CNTs-NH<sub>2</sub> and CF-Cu(OH)<sub>2</sub>@CNTs-COOH can be assembled to 3.471 and 8.722 mg·g<sup>-1</sup> within 1 min, respectively. Then the loading amount of CNTs-NH<sub>2</sub>/CNTs-COOH increases with the extension of electric field assembly time, but the increasing trend is also gradually slowing down. Because as the CNTs-NH<sub>2</sub>/CNTs-COOH are immobilized on the Cu(OH)<sub>2</sub> nanoneedles, the charge sites for electrostatic attraction are also reduced, and the positions on the Cu(OH)<sub>2</sub> nanoneedles are gradually occupied by the CNTs-NH<sub>2</sub>/CNTs-COOH. As the electric field assembly proceeds, the number of CNTs-NH<sub>2</sub>/CNTs-COOH that can be immobilized by the Cu(OH)<sub>2</sub> nanoneedles is gradually decreased.

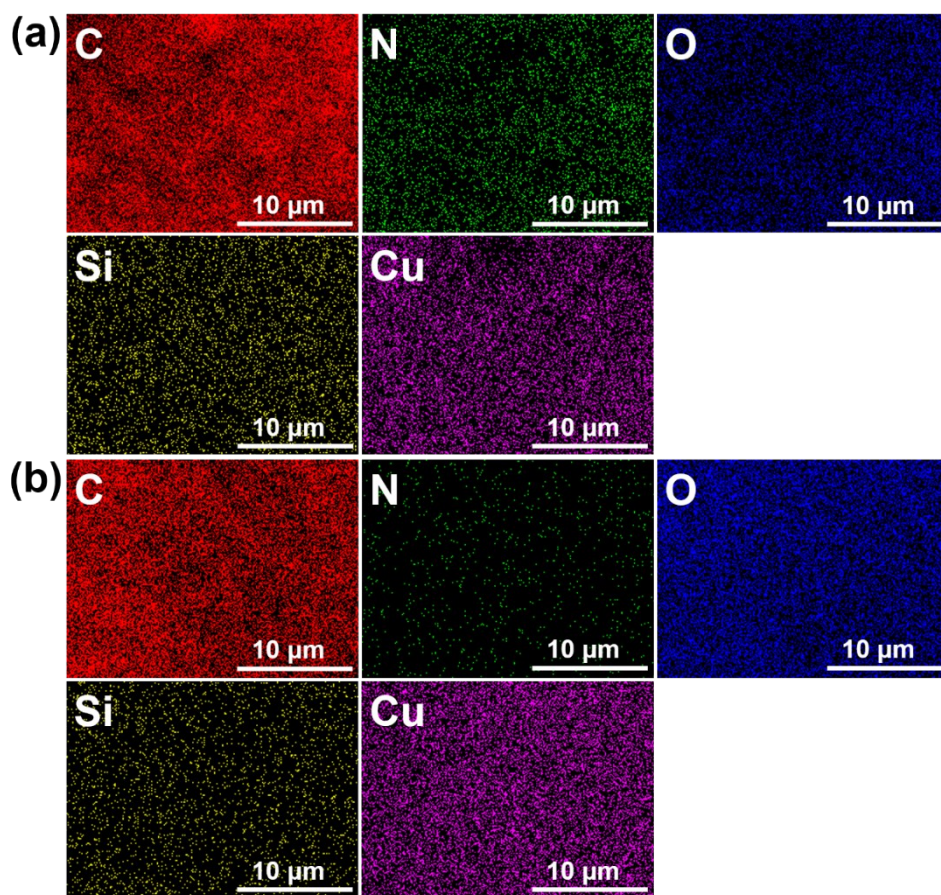

**Fig. S9** The EDS mapping for (a) CF-Cu(OH)<sub>2</sub>@CNTs-NH<sub>2</sub> and (b) CF-Cu(OH)<sub>2</sub>@CNTs-COOH.

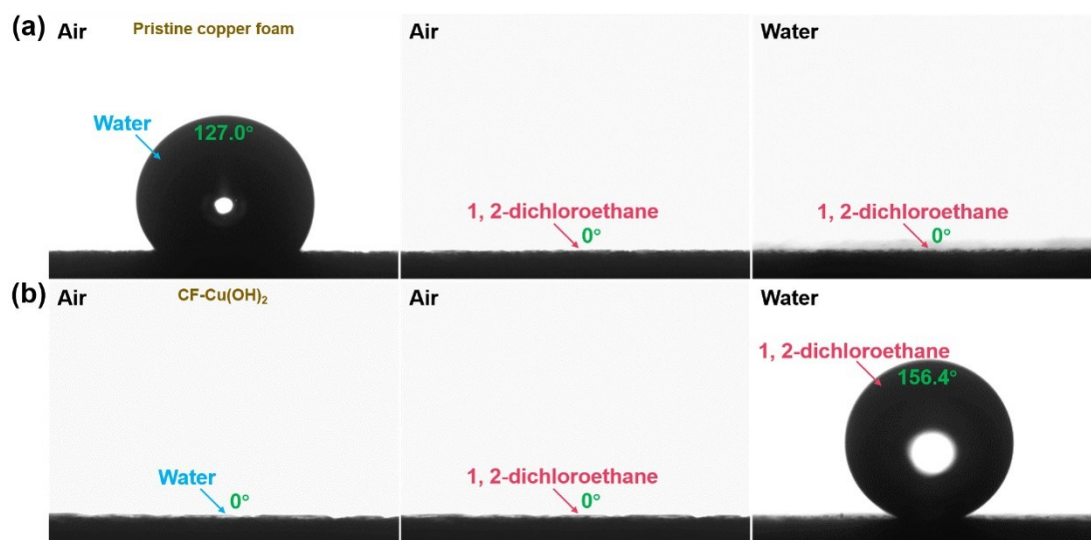

**Fig. S10** The water contact angle (WCA), oil contact angle (OCA) and underwater oil contact angle (UWOCA) of (a) pristine copper foam and (b) CF-Cu(OH)<sub>2</sub>.

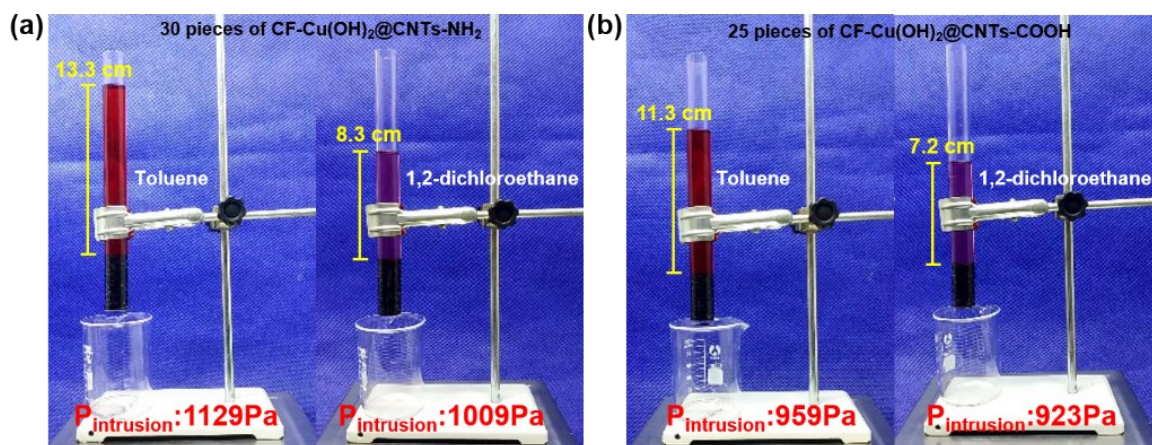

**Fig. S11** The measurement of oil intrusion pressures of 30 pieces of  $\text{CF-Cu(OH)}_2\text{@CNTs-NH}_2$  and 25 pieces of  $\text{CF-Cu(OH)}_2\text{@CNTs-COOH}$  (Oil are toluene (red) and 1,2-dichloroethane (purple)).

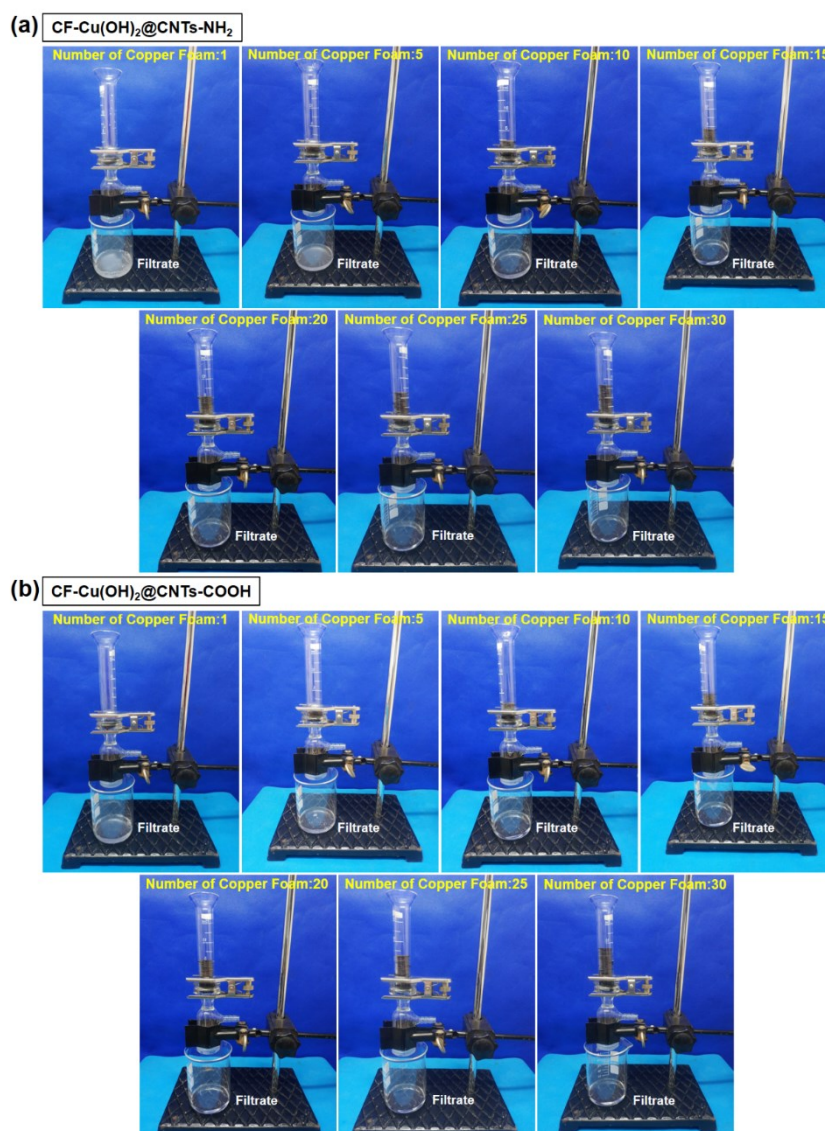

**Fig. S12** (a) The appearance of the filtrates for SDS-T/W emulsion separated by CF-S11



Cu(OH)<sub>2</sub>@CNTs-NH<sub>2</sub> with different numbers (1, 5, 10, 15, 20, 25 and 30). (b) The appearance of the filtrates for DTAC-T/W emulsion separated by CF-Cu(OH)<sub>2</sub>@CNTs-COOH with different numbers (1, 5, 10, 15, 20, 25 and 30).

**Table S1**

The atomic fractions of C, N, O and Si elemental for CF-Cu(OH)<sub>2</sub>, CF-Cu(OH)<sub>2</sub>@CNTs-NH<sub>2</sub> and CF-Cu(OH)<sub>2</sub>@CNTs-COOH.

| Material type                                | C (%) | N (%) | O (%) | Si (%) | Total  |
|----------------------------------------------|-------|-------|-------|--------|--------|
| CF-Cu(OH) <sub>2</sub>                       | 22.56 | -     | 77.44 | -      | 100.00 |
| CF-Cu(OH) <sub>2</sub> @CNTs-NH <sub>2</sub> | 67.00 | 14.29 | 15.79 | 2.92   | 100.00 |
| CF-Cu(OH) <sub>2</sub> @CNTs-COOH            | 63.48 | 3.99  | 28.73 | 3.80   | 100.00 |

**Table S2**

The intrusion pressures and the oil column heights of 30 pieces of CF-Cu(OH)<sub>2</sub>@CNTs-NH<sub>2</sub> and 25 pieces of CF-Cu(OH)<sub>2</sub>@CNTs-COOH contacting toluene and 1,2-dichloroethane.

| Material type                                             | Oil column height (cm) |                    | Intrusion pressure (Pa) |                    |
|-----------------------------------------------------------|------------------------|--------------------|-------------------------|--------------------|
|                                                           | Toluene                | 1,2-dichloroethane | Toluene                 | 1,2-dichloroethane |
| 30 pieces of CF-Cu(OH) <sub>2</sub> @CNTs-NH <sub>2</sub> | 13.3                   | 8.3                | 1129                    | 1009               |
| 25 pieces of CF-Cu(OH) <sub>2</sub> @CNTs-COOH            | 11.3                   | 7.2                | 959                     | 923                |
